# Supplementary material for: Detecting sample swaps in diverse NGS data types using linkage disequilibrium
Source: PubMed Central journal article supplement (PMC7391710; doi:10.1038/s41467-020-17453-5), 2020-07-29
Supplement: 41467_2020_17453_MOESM3_ESM.pdf [file 41467_2020_17453_MOESM3_ESM.pdf]

## **Descriptions of Additional Supplementary Files**

### **Supplementary Data 1**

**Description:** Metadata for all files used for benchmarking with verified donor annotations.

### **Supplementary Data 2**

**Description:** Metadata for all files used for benchmarking without verified donor annotations.

### **Supplementary Data 3**

**Description:** Metadata for all ENCODE files analysed.
